# Supplementary material for: Evaluation of bacterial adhesion strength on phospholipid copolymer films with antibacterial ability using microfluidic shear devices
Source: Royal Society of Chemistry journal article supplement (doi:10.1039/d1tb00657f), 2021-01-01
Supplement: d1tb00657f1.pdf [file d1tb00657f1.pdf]

Supporting information

## Evaluation of bacterial adhesion strength on phospholipid copolymer films with antibacterial ability by microfluidic shear devices

Yuta Kozuka<sup>a,†</sup>, Zhou Lu<sup>a,†</sup>, Tsukuru Masuda<sup>a</sup>, Shintaro Hara<sup>a</sup>, Toshihiro Kasama<sup>a</sup>, Ryo Miyake<sup>a</sup>, Norifumi Isu<sup>b</sup>, and Madoka Takai<sup>a\*</sup>

<sup>a</sup>Department of Bioengineering, School of Engineering, The University of Tokyo, 7-3-1, Hongo, Bunkyo-ku, 113-8656, Tokyo, Japan

\*E-mail: [takai@bis.t.u-tokyo.ac.jp](mailto:takai@bis.t.u-tokyo.ac.jp)

<sup>b</sup>LIXIL Corporation, 2-1-1, Ojima, Koto-ku, 136-8535, Tokyo, Japan

† These authors contributed equally to this work.

### SI. 1 Calculations for shear stress at the bottom of the channel

The movement of fluid in the physical domain is directed by governing equations, among which the Navier–Stokes equations<sup>S1</sup> are widely applied mathematical models to describe the flow properties during dynamic and/or thermal interactions.

$$\rho \left[ \frac{\partial \Delta \vec{V}}{\partial t} + (V \cdot \nabla) \vec{V} \right] = -\nabla p + \mu \nabla^2 \vec{V} + \vec{\rho} g. \quad \text{Eq. S1}$$

Eq. S1 is an expression of the Navier–Stokes equations, where  $\rho$  is the density of the fluid,  $V$  is the velocity of the fluid,  $t$  is the time,  $p$  is the pressure of the fluid, and  $g$  is the gravitational acceleration. In this study, the PBS was moved along a rectangular channel with a width ( $w$ ) of 4.2 mm, a height ( $h$ ) of 0.5 mm, and a length ( $L$ ) of 42 mm. The Navier–Stokes equation can be extended as:

$$\rho \left( \frac{\partial \Delta \vec{V}}{\partial t} + V_x \frac{\partial V_x}{\partial x} + V_y \frac{\partial V_x}{\partial y} + V_z \frac{\partial V_x}{\partial z} + V_x \frac{\partial V_y}{\partial x} + V_y \frac{\partial V_y}{\partial y} + V_z \frac{\partial V_y}{\partial z} + V_x \frac{\partial V_z}{\partial x} + V_y \frac{\partial V_z}{\partial y} + V_z \frac{\partial V_z}{\partial z} \right) = -\frac{\partial p}{\partial x} - \frac{\partial p}{\partial y} - \frac{\partial p}{\partial z} + \mu \left( \frac{\partial^2 V_x}{\partial x^2} + \frac{\partial^2 V_x}{\partial y^2} + \frac{\partial^2 V_x}{\partial z^2} + \frac{\partial^2 V_y}{\partial x^2} + \frac{\partial^2 V_y}{\partial y^2} + \frac{\partial^2 V_y}{\partial z^2} + \frac{\partial^2 V_z}{\partial x^2} + \frac{\partial^2 V_z}{\partial y^2} + \frac{\partial^2 V_z}{\partial z^2} \right) + \rho \vec{g}$$

Eq. S2

As fully developed fluid moves along the microchannel,  $V_y = V_z = 0$  and  $\frac{\partial p}{\partial y} = \frac{\partial p}{\partial z} = 0$ . In this situation,  $V_x$  is the only velocity component. The velocity did not vary with time at a; hence,  $\frac{\partial \Delta \vec{V}}{\partial t} = 0$ . As  $w \gg h$ , the effect of the sidewall was negligible; therefore, the microchannel can

be regarded as a parallel plate flow chamber wherein the fluid velocity did not vary along z-direction,  $\frac{\partial V_x}{\partial z} = 0$ , and  $V_x$  is the function of  $y$  only,  $\frac{\partial V_x}{\partial x} = 0$ . Finally, the channel was set horizontally such that the movement of the fluid is perpendicular to the gravitational force,  $\vec{g} = 0$ . Therefore, the equation can be simplified as,

$$0 = -\frac{\partial p}{\partial x} + \mu \frac{\partial^2 V_x}{\partial y^2}. \quad \text{Eq.S3}$$

The medium moves along the  $x$  direction,  $V_y = 0$ ; therefore  $-\frac{\partial p}{\partial x} = -\frac{dp}{dx}$ , and  $p = p(x)$ .

$V_x$  is a function of  $y$  only, implying  $\frac{\partial p}{\partial x} = \mu \frac{\partial^2 V_x}{\partial y^2} = p'$  (constant).

After integrating twice, the resulting equation is,

$$V_x = \frac{p'}{2\mu} y^2 + c_1 y + c_2. \quad \text{Eq. S4}$$

Based on the assumption that there is no slip condition at the solid surface, where

$$V_x = f(y) = 0 \quad (y = \pm h/2),$$

$$V_x = \frac{p'h^2}{2\mu} \left( \frac{y^2}{h^2} - \frac{1}{4} \right). \quad \text{Eq. S5}$$

The flow rate ( $Q$ ) in the microchannel can be obtained as,

$$Q = \int_{-h/2}^{h/2} V_x(y) \cdot w = -\frac{P'h^3}{12\mu} \cdot w. \quad \text{Eq.S6}$$

Therefore,  $p' = -\frac{12\mu Q}{h^3 w}$  is obtained.

Next, plot for Poiseuille flow to calculate the shear stress.

$$\tau = \mu \frac{dV_x}{dy} = \mu \frac{p'}{\mu} y = -\frac{12\mu Q}{h^3 w} y \quad \text{Eq. S7}$$

At the bottom of the channel, substituting  $y = -h/2$  into Eq. S7, the shear stress can be expressed as:

$$\tau = \frac{6\mu Q}{h^2 w}. \quad \text{Eq. S8}$$

## SI. 2 Quartz crystal microbalance (QCM) measurement for fibrinogen adsorption

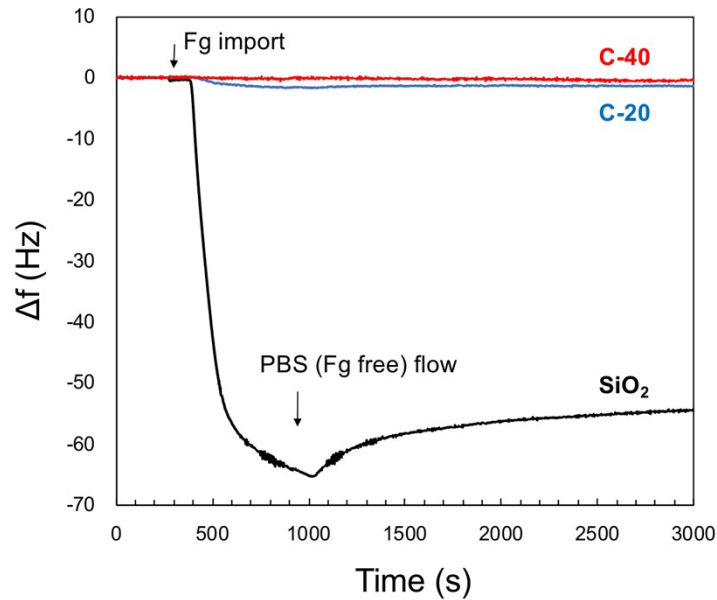

**Figure S1.** Result of the Fg adsorption on SiO<sub>2</sub>, C-20, and C-40 surfaces measured by

QCM.  $\Delta f$  ( $f$  in Hz) is the normalized frequency change by 7th overtone.

---

## References

S1 F. White, *Viscous Fluid Flow*, McGraw-Hill Mechanical Engineering: 1991.
